# Supplementary material for: A dual-functional luminescent Tb(iii) metal–organic framework for the selective sensing of acetone and TNP in water
Source: Royal Society of Chemistry journal article supplement (doi:10.1039/c7ra13494k), 2018-01-01
Supplement: c7ra13494k1.pdf [file c7ra13494k1.pdf]

## Electronic Supplementary Information

### A dual-functional luminescent Tb(III) metal-organic framework for selective sensing of acetone and TNP in water

Nidhi Goel,<sup>\*a,b</sup> and Naresh Kumar<sup>c</sup>

<sup>a</sup>School of Physical Sciences, Jawaharlal Nehru University, Delhi 110067, India

<sup>b</sup>Department of Chemistry, Institute of Science, Banaras Hindu University, Varanasi 221005, India

<sup>c</sup>Centre for Biosciences and Biomedical Engineering, Indian Institute of Technology Indore, Indore 453552, Madhya Pradesh, India

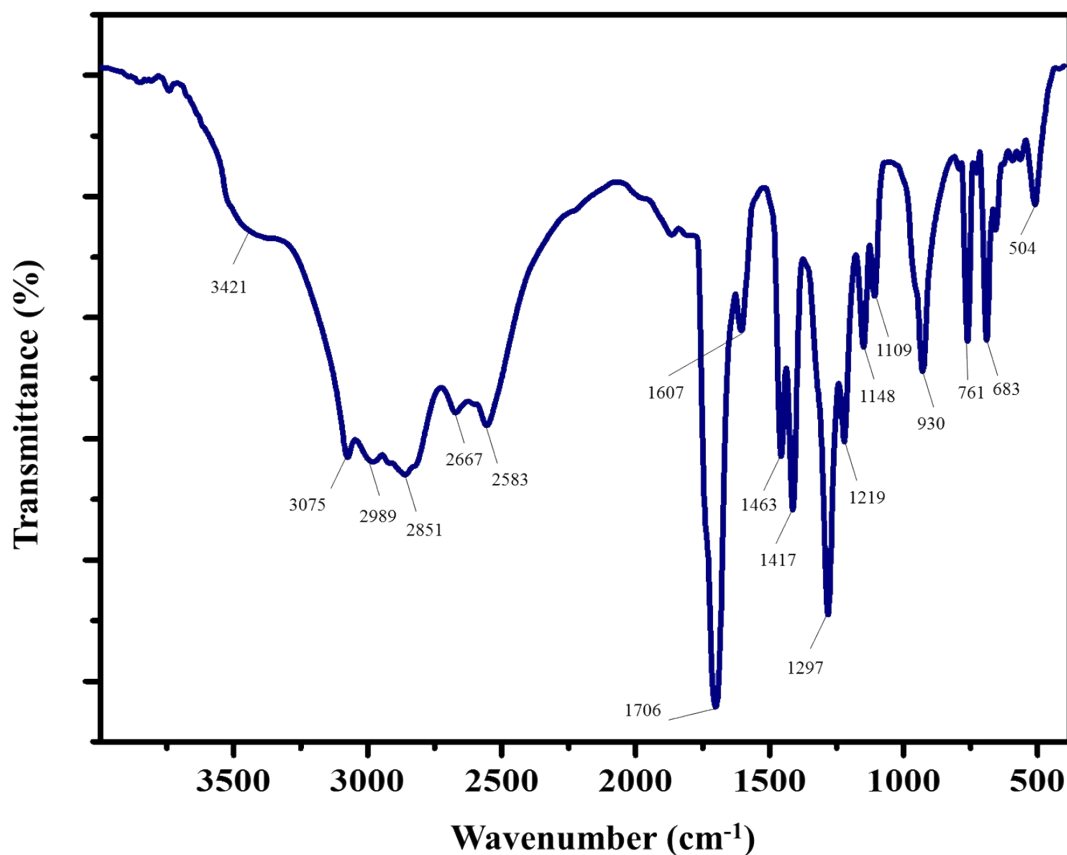

Figure S1. FT-IR spectrum of H<sub>4</sub>abtc (L<sub>2</sub>).

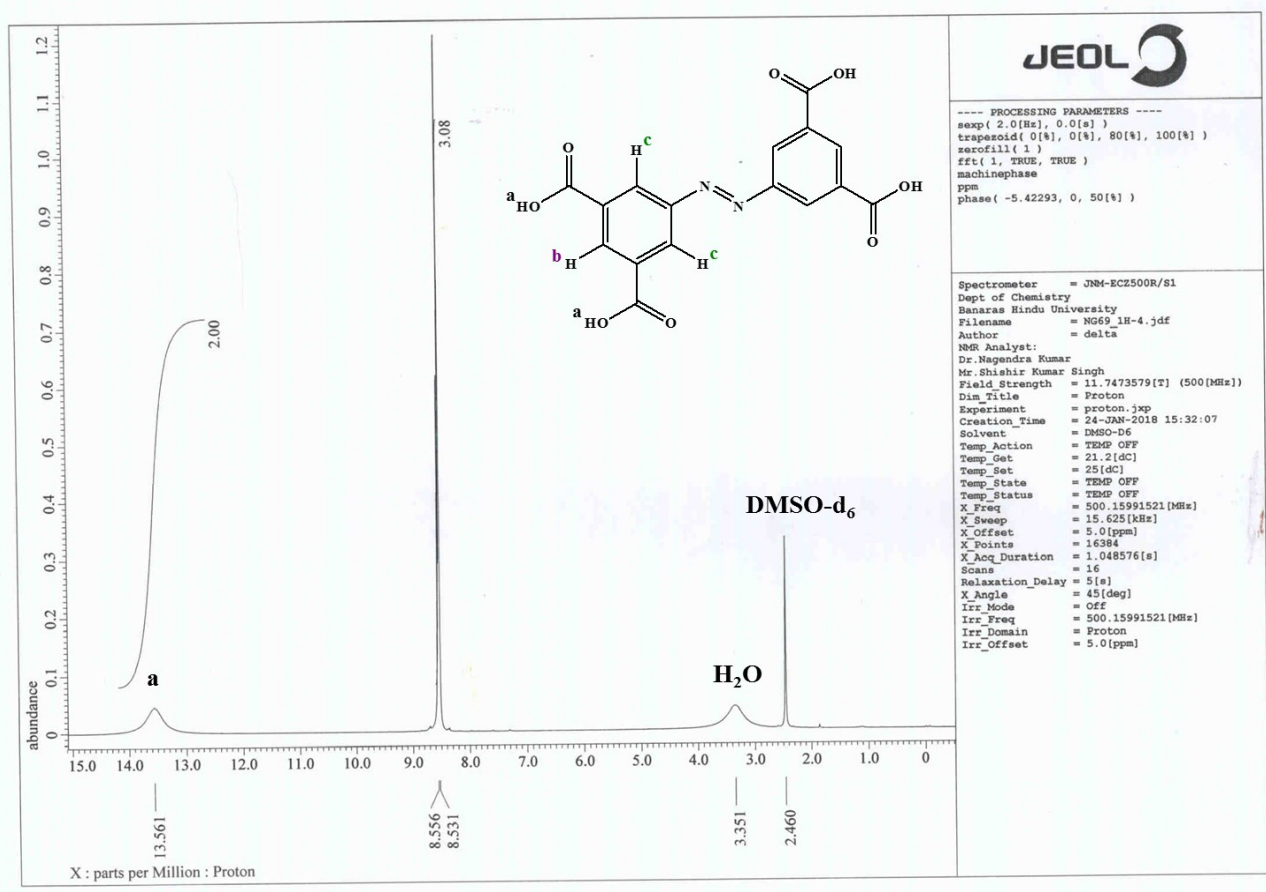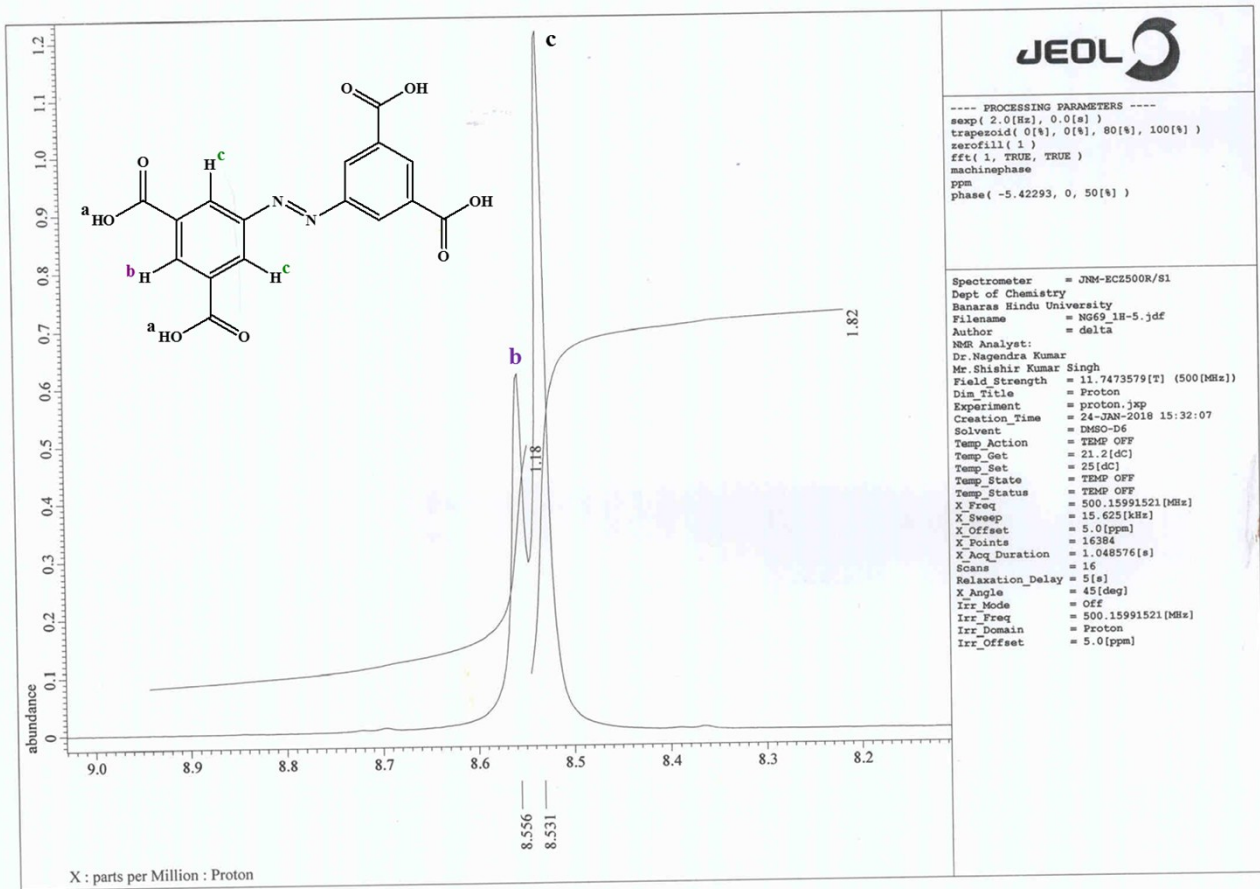

Figure S2. <sup>1</sup>H NMR spectra of L<sub>2</sub>.

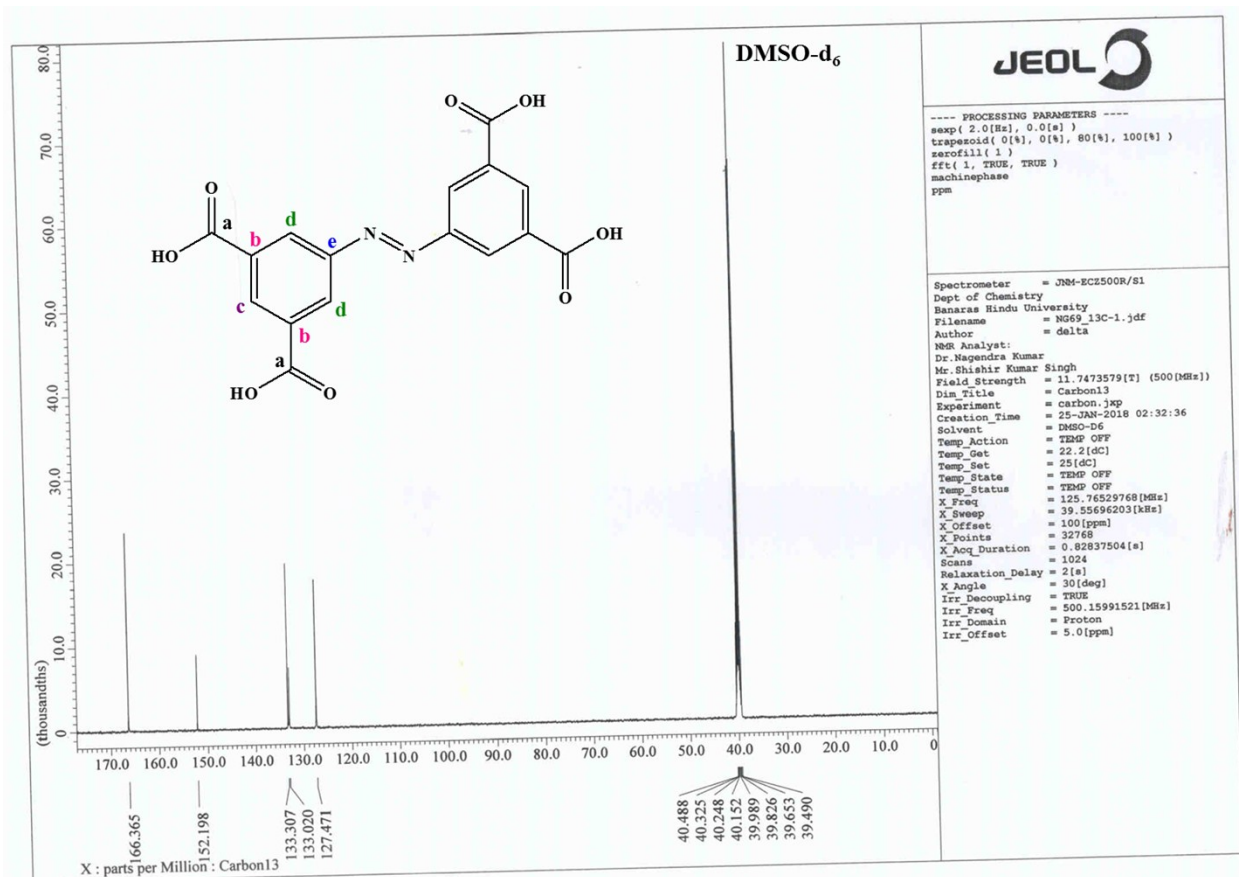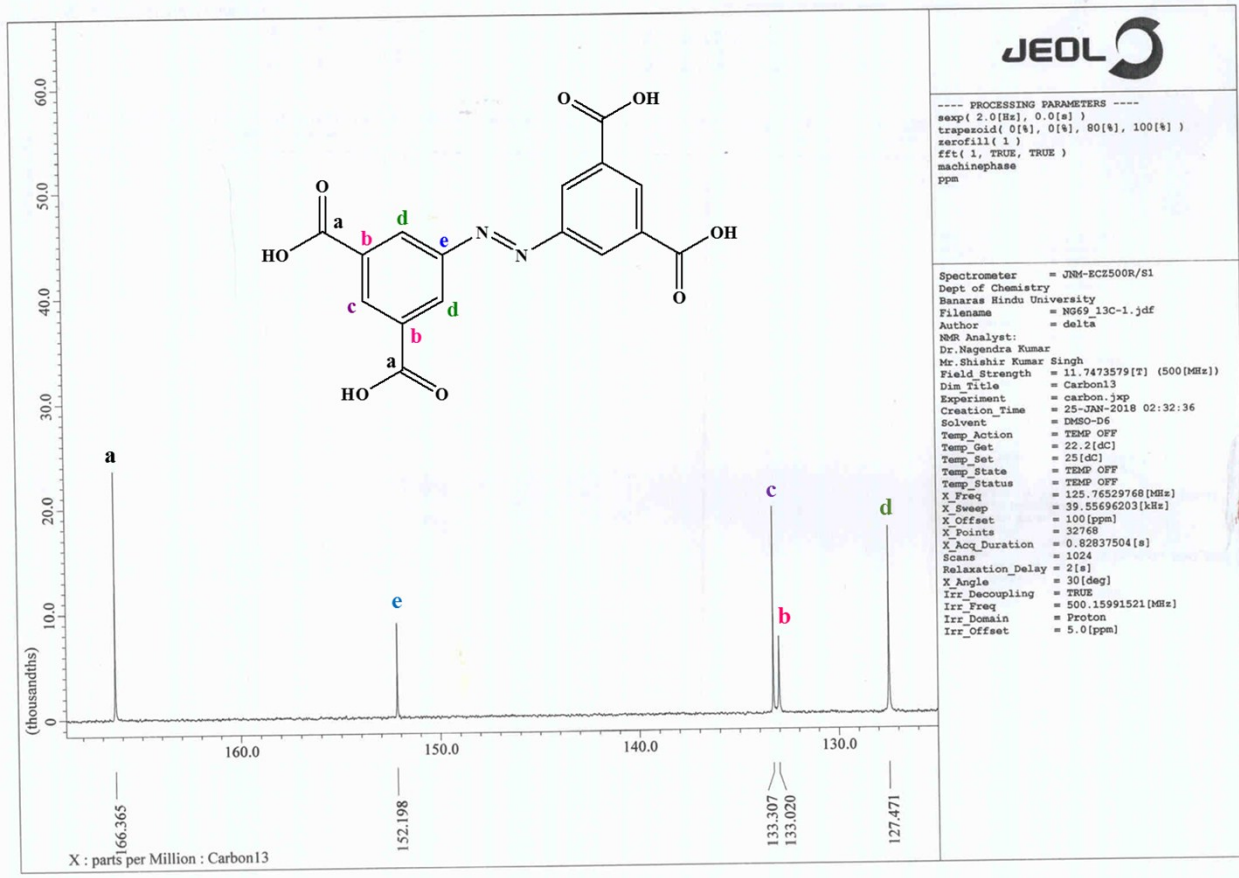

Figure S3. <sup>13</sup>C NMR spectra of L<sub>2</sub>.

# Display Report

## Analysis Info

Analysis Name D:\Data\January 2018\h ak-nkg-001\_RA5\_01\_6035.d  
Method 7. LC-MS tune\_low meoh.m  
Sample Name h ak-nkg-001  
Comment

Acquisition Date 1/19/2018 4:00:40 PM

Operator Ghanashyam Bhavsar  
Instrument micrOTOF-Q II 10348

## Acquisition Parameter

|             |          |                       |           |                  |           |
|-------------|----------|-----------------------|-----------|------------------|-----------|
| Source Type | ESI      | Ion Polarity          | Positive  | Set Nebulizer    | 1.0 Bar   |
| Focus       | Active   | Set Capillary         | 4500 V    | Set Dry Heater   | 250 °C    |
| Scan Begin  | 50 m/z   | Set End Plate Offset  | -500 V    | Set Dry Gas      | 7.0 l/min |
| Scan End    | 2000 m/z | Set Collision Cell RF | 150.0 Vpp | Set Divert Valve | Waste     |

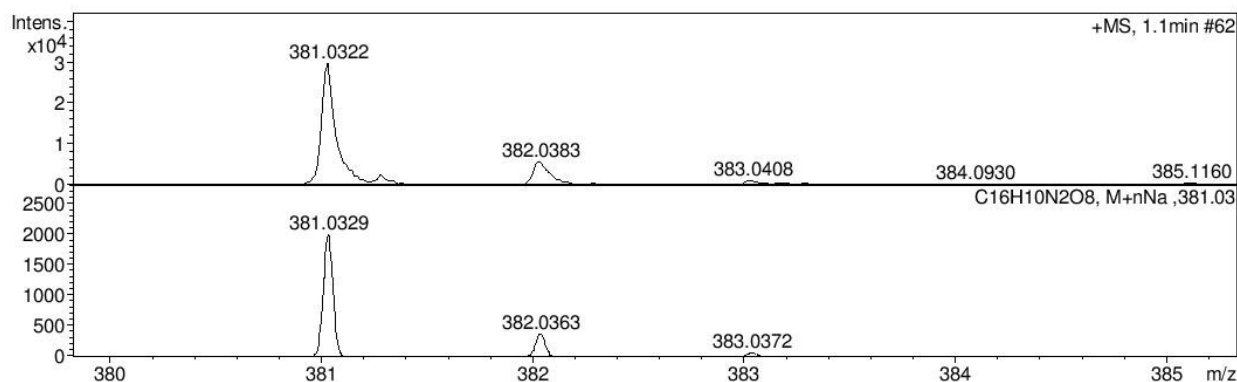

Bruker Compass DataAnalysis 4.0

printed: 1/19/2018 4:03:01 PM

Page 1 of 1

Figure S4. HRMS spectra of L<sub>2</sub>.

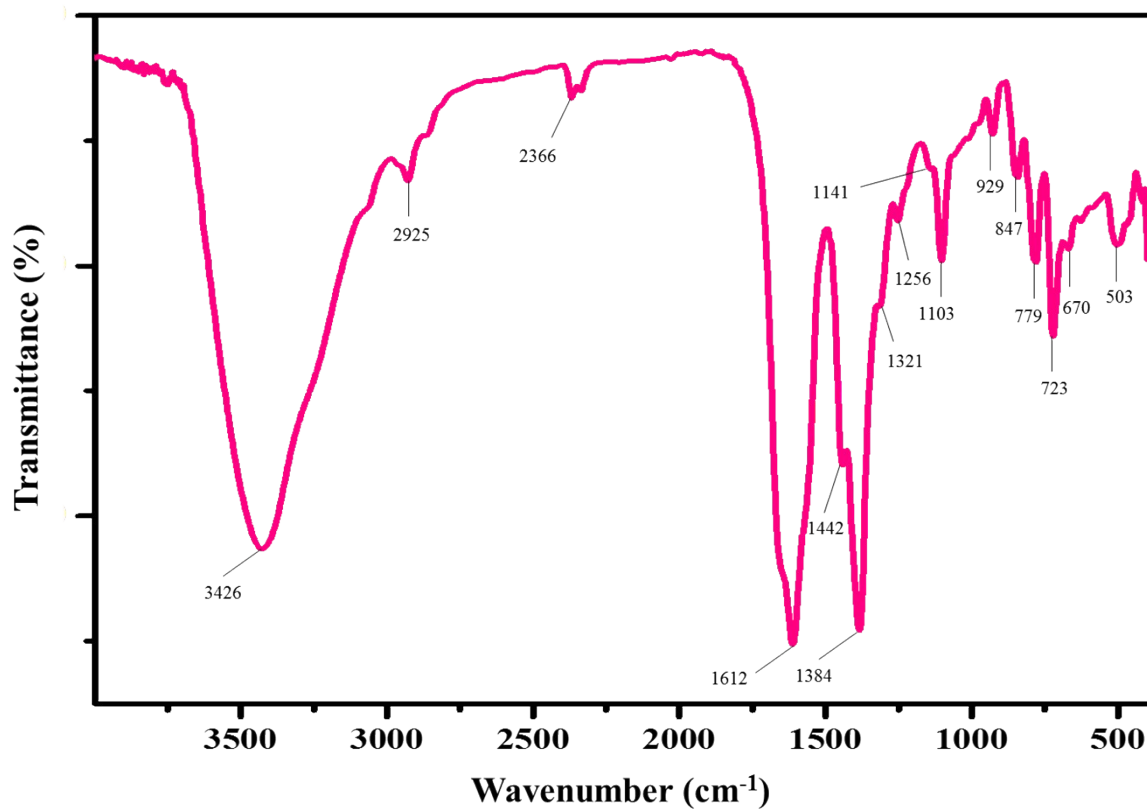

Figure S5. FT-IR spectrum of TPA-MOF.

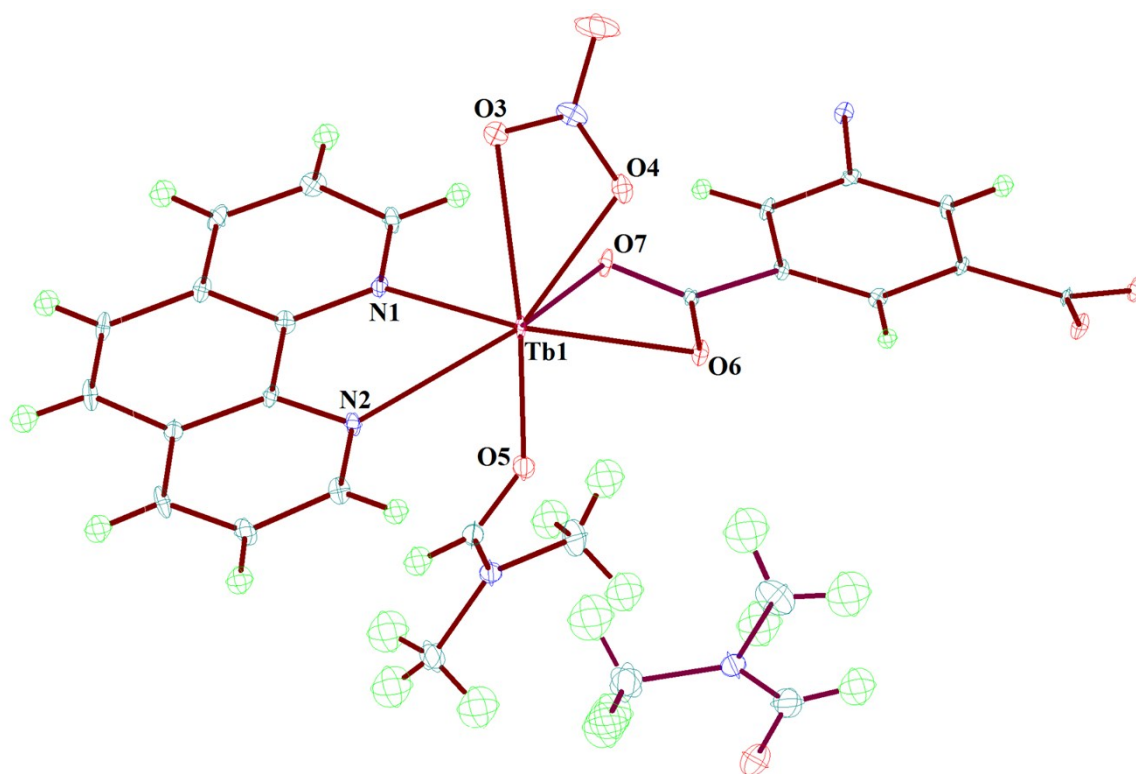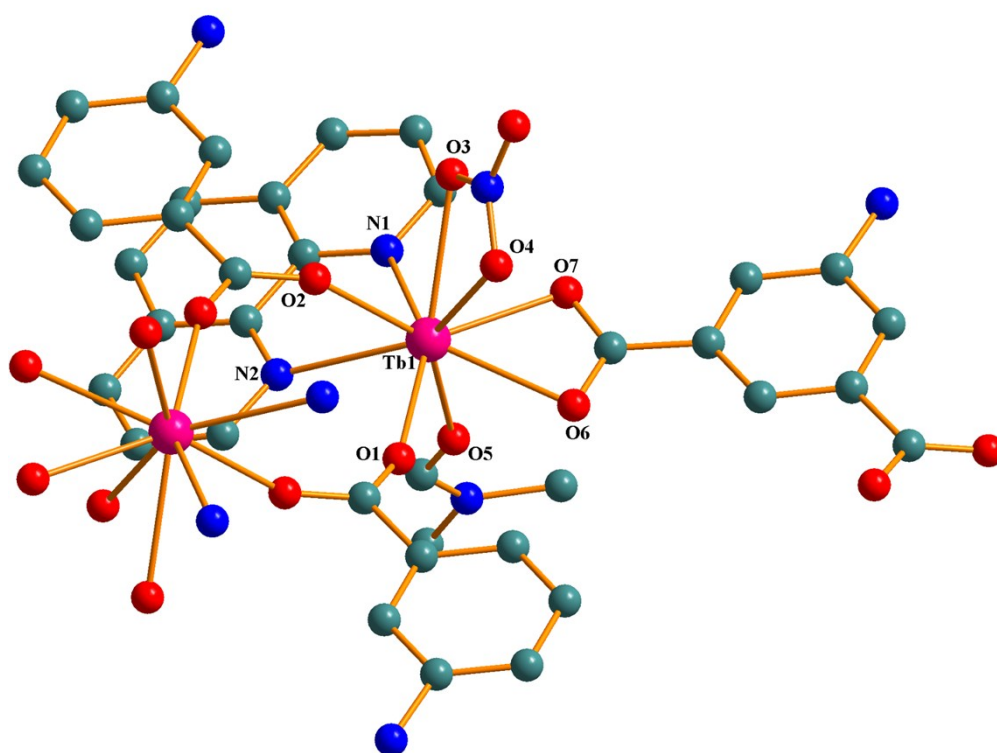

**Figure S6.** (a) ORTEP representation of TPA-MOF in asymmetric unit. Thermal ellipsoids were drawn at the 30% probability level, (b) coordination behaviour around Tb metal centre (Hydrogens have been omitted for clarity). Color code: Tb; pink, O; red, N; blue, C; teal.

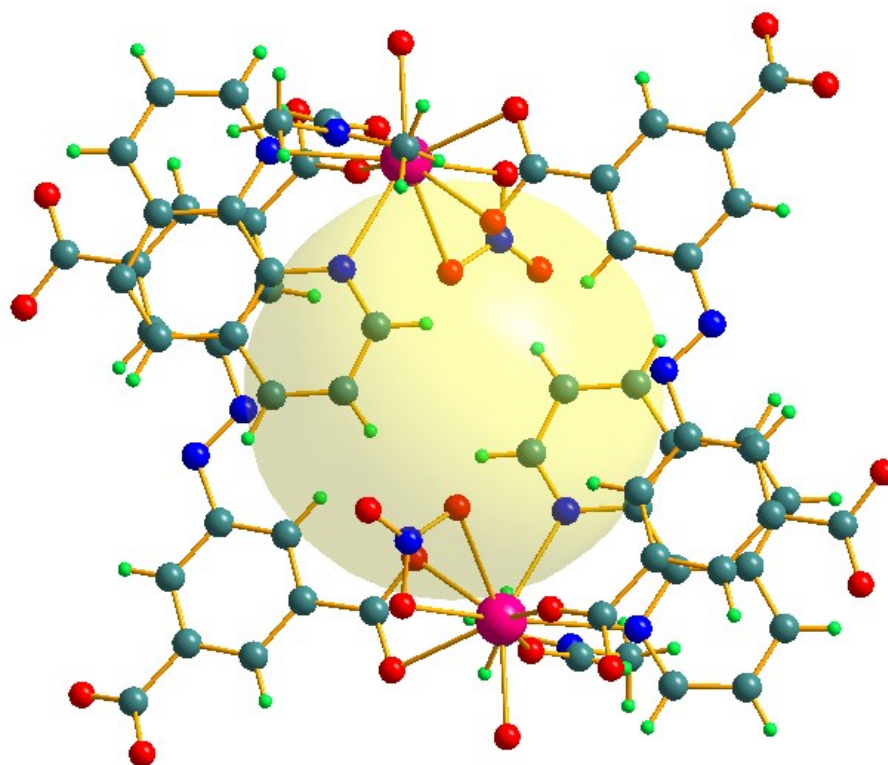

**Figure S7.** Micro-channel having 4Å Vander Wall radius. Color code: Tb; pink, O; red, N; blue, C; teal, and H; green.

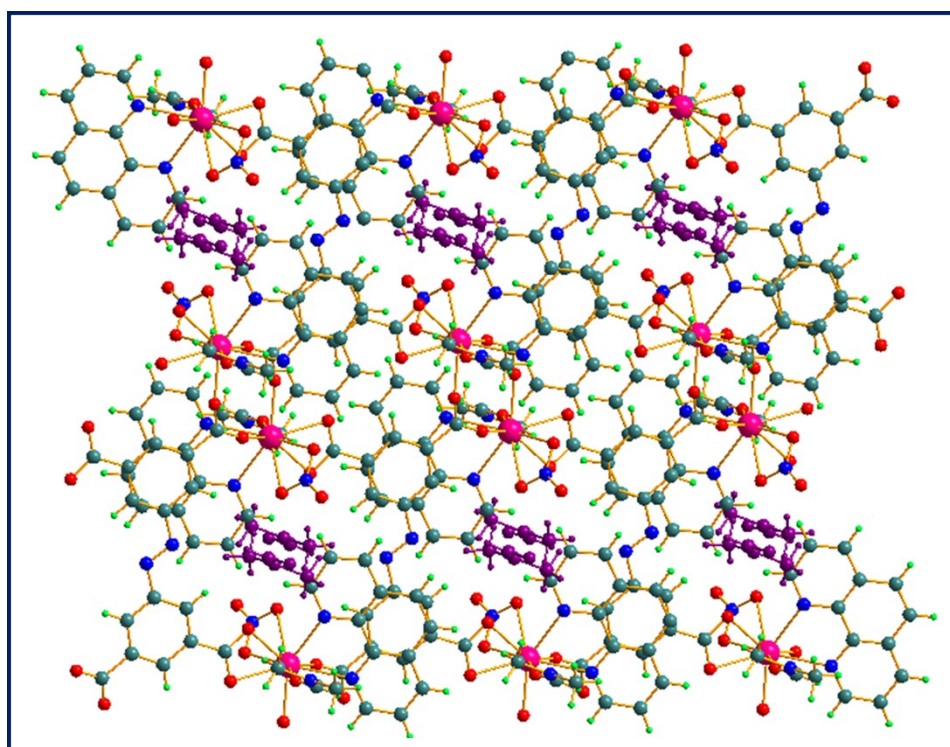

**Figure S8.** Perspective view of TPA-MOF. Color code: Tb; pink, O; red, N; blue, C; teal, H; green and DMF (guest), purple.

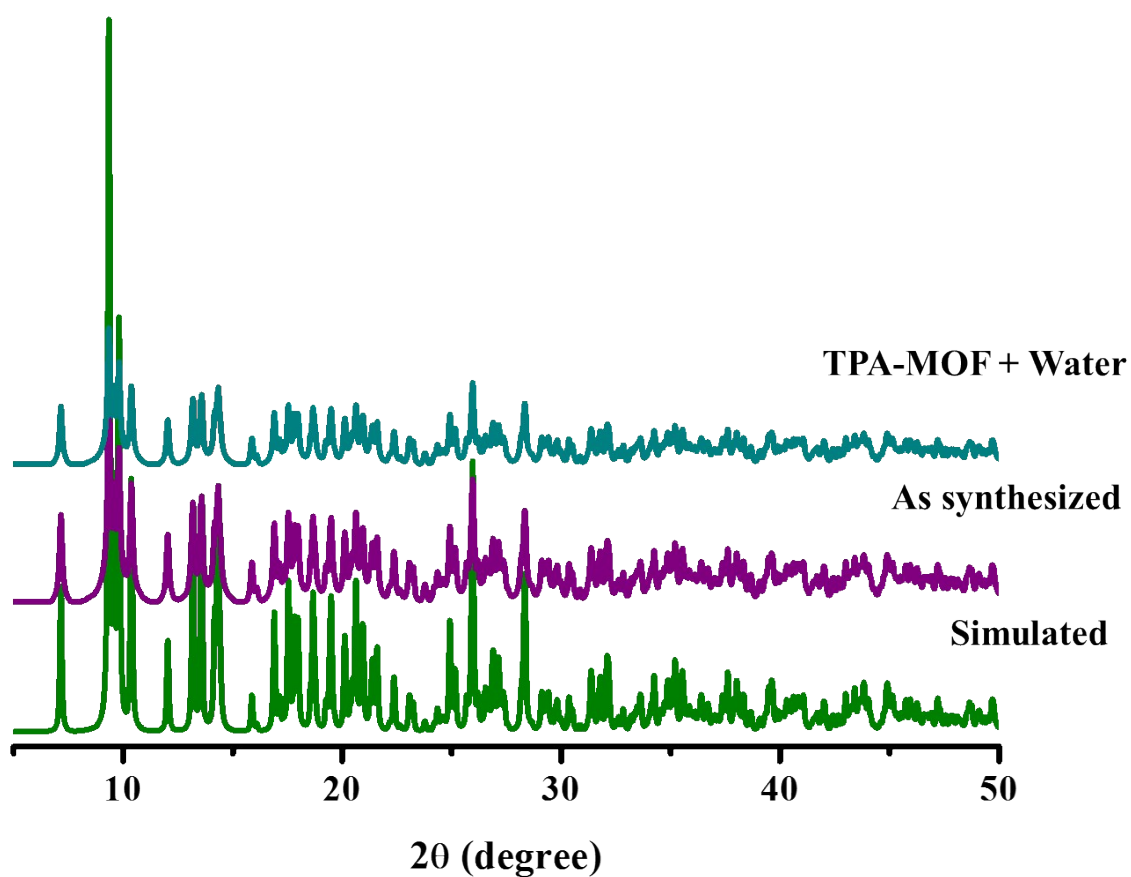

(a)

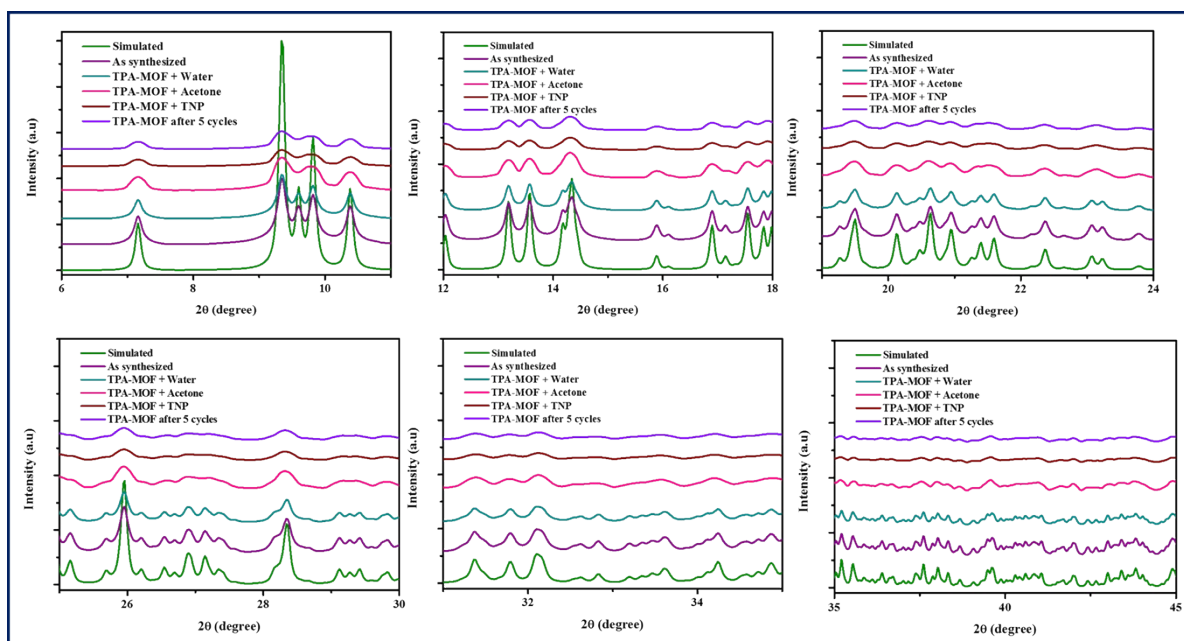

(b)

**Figure S9.** (a) Simulated and experimental powder X-ray diffraction pattern of TPA-MOF and TPA-MOF in water, (b) magnifying PXRD images in the scan range of 6-45° ( $2\theta$ ), obtained after immersing in H<sub>2</sub>O (4 days), acetone, TNP for 72 h and recycled sample after five cycles.

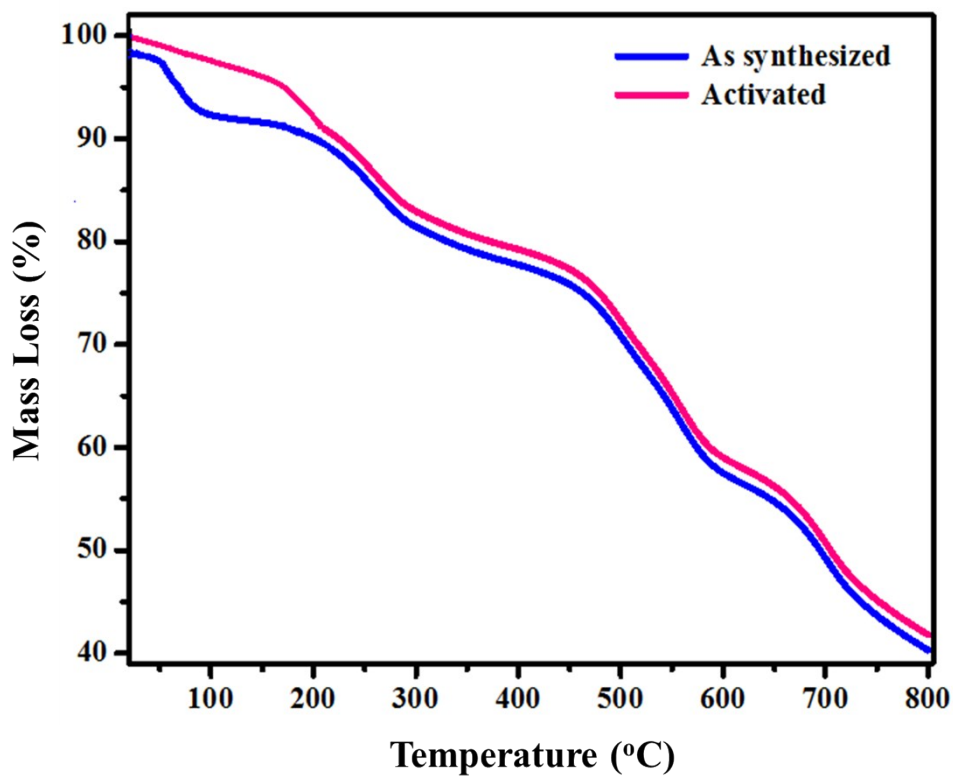

Figure S10. As synthesized and activated TG of TPA-MOF.

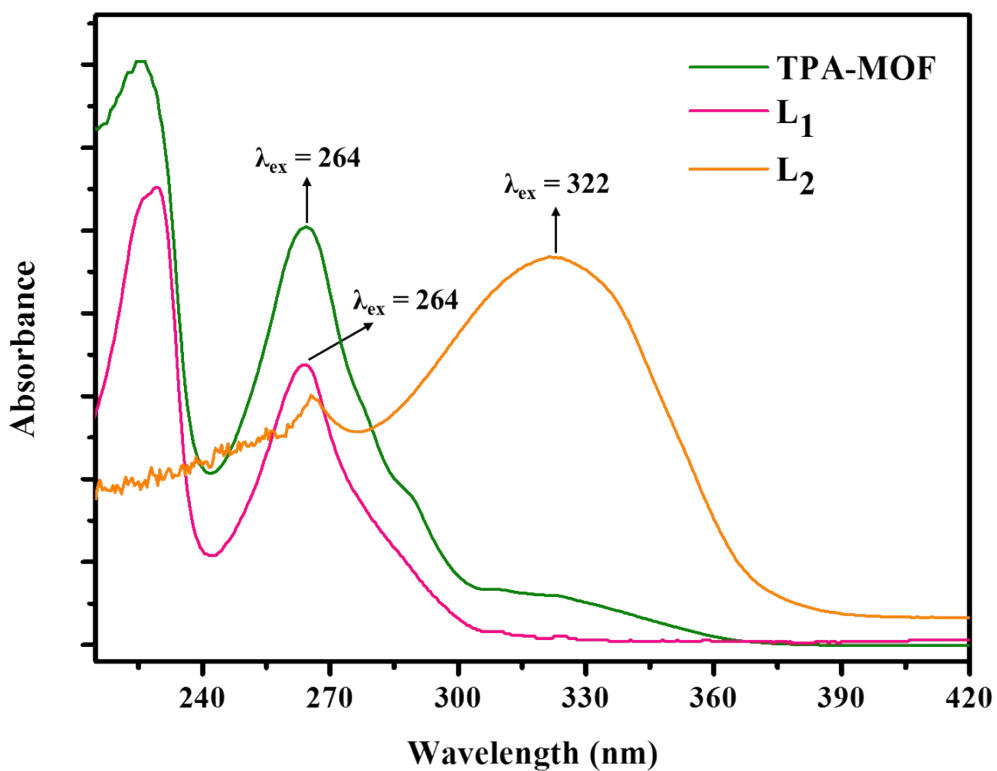

Figure S11. Comparative absorption spectra of ligands (L<sub>1</sub> and L<sub>2</sub>) and TPA-MOF.



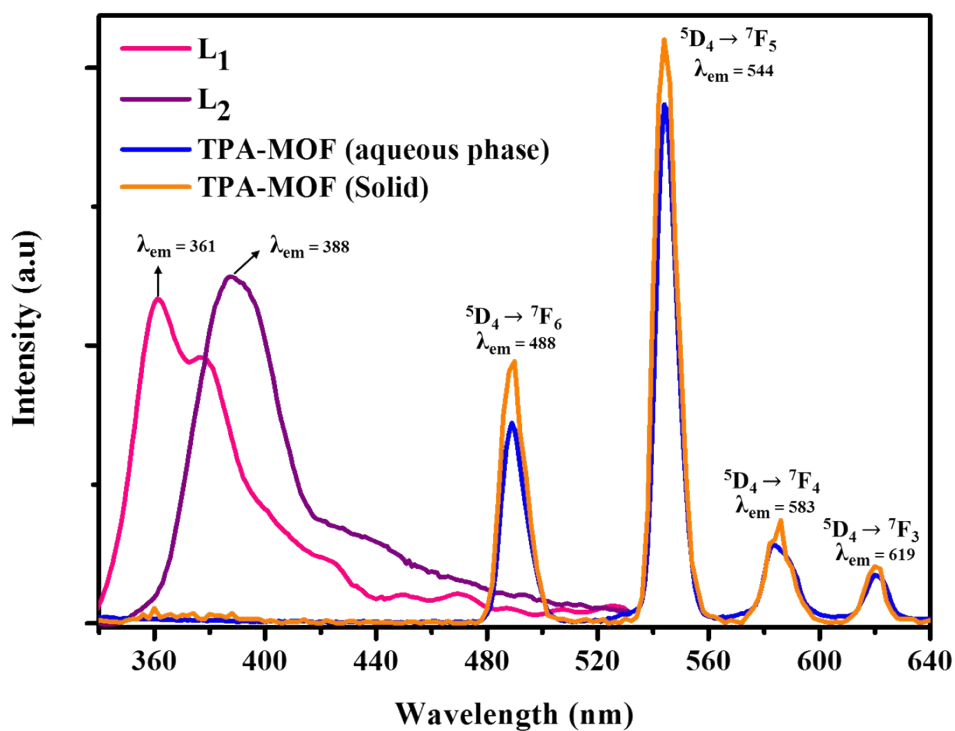

**Figure S12.** Comparative emission spectra of ligands ( $L_1$  and  $L_2$ ) and TPA-MOF.

The relative fluorescence intensity is linear with TNP concentration in the range of (0-400 ppm).

$$F_0/F = 15.971[\text{TNP}(\text{ppm})] + 1, (R^2 = 0.99025)$$

$$K_{sv} = 15.971 \text{ ppm}^{-1}$$

$$1M = 35,500 \text{ ppm}$$

$$1/35,500 \text{ ppm}^{-1} = 1M^{-1}$$

$$15.971 \text{ ppm}^{-1} = 5.67 \times 10^5 M^{-1}$$

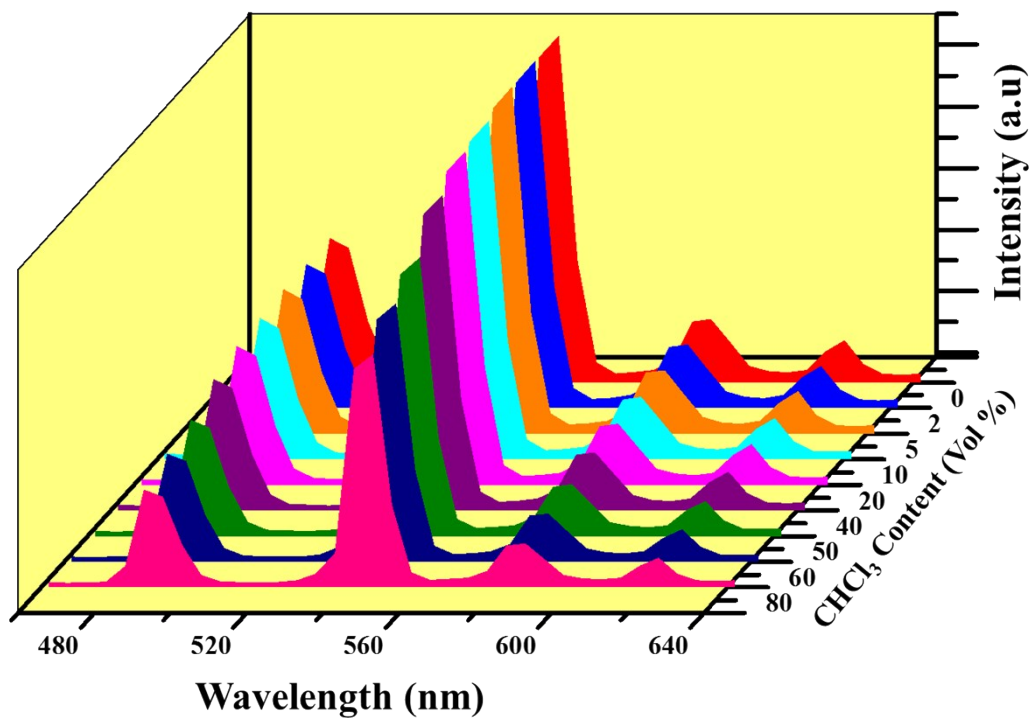

**Figure S13.** Spectra of TPA-MOF in presence of variable amounts of chloroform.

**Table S1.** Bond lengths (Å) for TPA-MOF.

|                       |          |                       |          |
|-----------------------|----------|-----------------------|----------|
| Tb1—O1                | 2.283(3) | C4—C11                | 1.403(5) |
| Tb1—O2 <sup>i</sup>   | 2.346(4) | C4—C5                 | 1.437(6) |
| Tb1—O5                | 2.360(4) | C5—C6                 | 1.349(7) |
| Tb1—O7 <sup>ii</sup>  | 2.402(4) | C5—H5                 | 0.950(4) |
| Tb1—O4                | 2.474(5) | C6—C7                 | 1.431(6) |
| Tb1—O6 <sup>ii</sup>  | 2.486(4) | C6—H6                 | 0.950(4) |
| Tb1—N1                | 2.538(6) | C7—C12                | 1.403(6) |
| Tb1—O3                | 2.595(4) | C7—C8                 | 1.404(7) |
| Tb1—N2                | 2.599(5) | C8—C9                 | 1.365(5) |
| Tb1—C20 <sup>ii</sup> | 2.800(5) | C8—H8                 | 0.950(4) |
| Tb1—N3                | 2.953(5) | C9—C10                | 1.395(6) |
| O1—C13                | 1.261(5) | C9—H9                 | 0.950(5) |
| O2—C13                | 1.252(6) | C10—H10               | 0.950(4) |
| O2—Tb1 <sup>i</sup>   | 2.346(4) | C11—C12               | 1.443(7) |
| O3—N3                 | 1.267(5) | C13—C14               | 1.503(6) |
| O4—N3                 | 1.265(5) | C14—C19               | 1.392(6) |
| O5—C21                | 1.240(5) | C14—C15               | 1.407(7) |
| O6—C20                | 1.256(5) | C15—C16               | 1.395(6) |
| O6—Tb1 <sup>ii</sup>  | 2.486(4) | C15—H15               | 0.950(4) |
| O7—C20                | 1.268(5) | C16—C17               | 1.397(6) |
| O7—Tb1 <sup>ii</sup>  | 2.402(4) | C16—C20               | 1.500(7) |
| O8—N3                 | 1.228(6) | C17—C18               | 1.390(7) |
| O9—C24                | 1.275(9) | C17—H17               | 0.950(4) |
| N1—C1                 | 1.326(6) | C18—C19               | 1.390(6) |
| N1—C11                | 1.363(5) | C19—H19               | 0.950(5) |
| N2—C10                | 1.326(6) | C20—Tb1 <sup>ii</sup> | 2.800(5) |
| N2—C12                | 1.359(5) | C21—H21               | 0.951(5) |
| N4—N4 <sup>iii</sup>  | 1.245(4) | C22—H22A              | 0.979(7) |
| N4—C18                | 1.442(5) | C22—H22B              | 0.980(6) |
| N5—C21                | 1.311(7) | C22—H22C              | 0.980(6) |
| N5—C23                | 1.455(8) | C23—H23A              | 0.980(6) |
| N5—C22                | 1.459(6) | C23—H23B              | 0.980(5) |
| N6—C24                | 1.302(7) | C23—H23C              | 0.979(6) |
| N6—C26                | 1.443(7) | C24—H24               | 0.950(6) |
| N6—C25                | 1.458(9) | C25—H25A              | 0.980(6) |
| C1—C2                 | 1.399(6) | C25—H25B              | 0.979(7) |
| C1—H1                 | 0.950(4) | C25—H25C              | 0.980(6) |
| C2—C3                 | 1.365(7) | C26—H26A              | 0.981(8) |
| C2—H2                 | 0.950(5) | C26—H26B              | 0.980(7) |
| C3—C4                 | 1.412(7) | C26—H26C              | 0.980(8) |
| C3—H3                 | 0.950(4) |                       |          |

**Table S2.** Bond angles (°) for TPA-MOF.

|                                         |            |             |            |
|-----------------------------------------|------------|-------------|------------|
| O1—Tb1—O2 <sup>i</sup>                  | 82.13(10)  | C2—C3—C4    | 118.65(44) |
| O1—Tb1—O5                               | 86.76(10)  | C2—C3—H3    | 120.67(44) |
| O2 <sup>i</sup> —Tb1—O5                 | 141.45(11) | C4—C3—H3    | 120.68(37) |
| O1—Tb1—O7 <sup>ii</sup>                 | 128.54(9)  | C11—C4—C3   | 118.53(34) |
| O2 <sup>i</sup> —Tb1—O7 <sup>ii</sup>   | 137.02(10) | C11—C4—C5   | 119.94(37) |
| O5—Tb1—O7 <sup>ii</sup>                 | 76.94(10)  | C3—C4—C5    | 121.51(40) |
| O1—Tb1—O4                               | 90.08(10)  | C6—C5—C4    | 120.32(39) |
| O2 <sup>i</sup> —Tb1—O4                 | 72.91(11)  | C6—C5—H5    | 119.86(37) |
| O5—Tb1—O4                               | 144.15(11) | C4—C5—H5    | 119.81(39) |
| O7 <sup>ii</sup> —Tb1—O4                | 77.36(10)  | C5—C6—C7    | 121.30(35) |
| O1—Tb1—O6 <sup>ii</sup>                 | 75.26(10)  | C5—C6—H6    | 119.36(43) |
| O2 <sup>i</sup> —Tb1—O6 <sup>ii</sup>   | 136.16(11) | C7—C6—H6    | 119.34(39) |
| O5—Tb1—O6 <sup>ii</sup>                 | 74.57(11)  | C12—C7—C8   | 117.53(39) |
| O7 <sup>ii</sup> —Tb1—O6 <sup>ii</sup>  | 53.44(11)  | C12—C7—C6   | 119.73(37) |
| O4—Tb1—O6 <sup>ii</sup>                 | 70.12(10)  | C8—C7—C6    | 122.73(34) |
| O1—Tb1—N1                               | 147.03(10) | C9—C8—C7    | 119.12(35) |
| O2 <sup>i</sup> —Tb1—N1                 | 92.21(10)  | C9—C8—H8    | 120.43(41) |
| O5—Tb1—N1                               | 77.59(10)  | C7—C8—H8    | 120.45(42) |
| O7 <sup>ii</sup> —Tb1—N1                | 76.1(1)    | C8—C9—C10   | 119.48(38) |
| O4—Tb1—N1                               | 119.37(10) | C8—C9—H9    | 120.25(37) |
| O6 <sup>ii</sup> —Tb1—N1                | 126.31(10) | C10—C9—H9   | 120.27(41) |
| O1—Tb1—O3                               | 135.14(9)  | N2—C10—C9   | 123.38(39) |
| O2 <sup>i</sup> —Tb1—O3                 | 67.87(11)  | N2—C10—H10  | 118.30(37) |
| O5—Tb1—O3                               | 137.13(11) | C9—C10—H10  | 118.32(40) |
| O7 <sup>ii</sup> —Tb1—O3                | 69.31(10)  | N1—C11—C4   | 122.05(37) |
| O4—Tb1—O3                               | 50.35(11)  | N1—C11—C12  | 118.56(38) |
| O6 <sup>ii</sup> —Tb1—O3                | 103.73(10) | C4—C11—C12  | 119.38(34) |
| N1—Tb1—O3                               | 69.38(10)  | N2—C12—C7   | 123.13(37) |
| O1—Tb1—N2                               | 83.80(11)  | N2—C12—C11  | 117.54(34) |
| O2 <sup>i</sup> —Tb1—N2                 | 69.05(11)  | C7—C12—C11  | 119.30(38) |
| O5—Tb1—N2                               | 73.13(11)  | O2—C13—O1   | 124.06(37) |
| O7 <sup>ii</sup> —Tb1—N2                | 134.02(11) | O2—C13—C14  | 118.27(38) |
| O4—Tb1—N2                               | 141.94(11) | O1—C13—C14  | 117.65(32) |
| O6 <sup>ii</sup> —Tb1—N2                | 142.20(11) | C19—C14—C15 | 119.57(37) |
| N1—Tb1—N2                               | 64.01(11)  | C19—C14—C13 | 119.96(33) |
| O3—Tb1—N2                               | 113.22(10) | C15—C14—C13 | 120.47(38) |
| O1—Tb1—C20 <sup>ii</sup>                | 101.91(11) | C16—C15—C14 | 119.35(39) |
| O2 <sup>i</sup> —Tb1—C20 <sup>ii</sup>  | 143.18(12) | C16—C15—H15 | 120.37(37) |
| O5—Tb1—C20 <sup>ii</sup>                | 75.25(12)  | C14—C15—H15 | 120.27(39) |
| O7 <sup>ii</sup> —Tb1—C20 <sup>ii</sup> | 26.84(11)  | C15—C16—C17 | 120.78(35) |
| O4—Tb1—C20 <sup>ii</sup>                | 70.52(12)  | C15—C16—C20 | 121.15(38) |
| O6 <sup>ii</sup> —Tb1—C20 <sup>ii</sup> | 26.66(12)  | C17—C16—C20 | 118.00(36) |
| N1—Tb1—C20 <sup>ii</sup>                | 101.85(11) | C18—C17—C16 | 119.43(37) |
| O3—Tb1—C20 <sup>ii</sup>                | 85.41(11)  | C18—C17—H17 | 120.25(42) |
| N2—Tb1—C20 <sup>ii</sup>                | 147.47(12) | C16—C17—H17 | 120.31(37) |
| O1—Tb1—N3                               | 112.82(11) | C17—C18—C19 | 120.26(40) |
| O2 <sup>i</sup> —Tb1—N3                 | 67.98(12)  | C17—C18—N4  | 123.78(36) |

|                           |            |                           |            |
|---------------------------|------------|---------------------------|------------|
| O5—Tb1—N3                 | 148.83(12) | C19—C18—N4                | 115.94(32) |
| O7 <sup>ii</sup> —Tb1—N3  | 71.89(11)  | C18—C19—C14               | 120.60(35) |
| O4—Tb1—N3                 | 25.00(11)  | C18—C19—H19               | 119.71(42) |
| O6 <sup>ii</sup> —Tb1—N3  | 86.84(11)  | C14—C19—H19               | 119.68(40) |
| N1—Tb1—N3                 | 94.58(11)  | O6—C20—O7                 | 121.17(34) |
| O3—Tb1—N3                 | 25.35(11)  | O6—C20—C16                | 120.13(36) |
| N2—Tb1—N3                 | 130.63(11) | O7—C20—C16                | 118.67(38) |
| C20 <sup>ii</sup> —Tb1—N3 | 77.02(12)  | O6—C20—Tb1 <sup>ii</sup>  | 62.58(22)  |
| C13—O1—Tb1                | 154.63(24) | O7—C20—Tb1 <sup>ii</sup>  | 58.78(22)  |
| C13—O2—Tb1 <sup>i</sup>   | 150.65(29) | C16—C20—Tb1 <sup>ii</sup> | 173.45(30) |
| N3—O3—Tb1                 | 93.33(26)  | O5—C21—N5                 | 124.10(44) |
| N3—O4—Tb1                 | 99.22(27)  | O5—C21—H21                | 117.95(51) |
| C21—O5—Tb1                | 145.17(32) | N5—C21—H21                | 117.96(47) |
| C20—O6—Tb1 <sup>ii</sup>  | 90.76(26)  | N5—C22—H22A               | 109.52(49) |
| C20—O7—Tb1 <sup>ii</sup>  | 94.38(25)  | N5—C22—H22B               | 109.43(49) |
| C1—N1—C11                 | 117.82(36) | H22A—C22—H22B             | 109.52(55) |
| C1—N1—Tb1                 | 121.59(27) | N5—C22—H22C               | 109.49(50) |
| C11—N1—Tb1                | 120.02(26) | H22A—C22—H22C             | 109.49(58) |
| C10—N2—C12                | 117.34(35) | H22B—C22—H22C             | 109.38(56) |
| C10—N2—Tb1                | 123.36(28) | N5—C23—H23A               | 109.41(49) |
| C12—N2—Tb1                | 118.58(27) | N5—C23—H23B               | 109.49(45) |
| O8—N3—O4                  | 121.79(42) | H23A—C23—H23B             | 109.50(51) |
| O8—N3—O3                  | 121.09(42) | N5—C23—H23C               | 109.41(49) |
| O4—N3—O3                  | 117.09(34) | H23A—C23—H23C             | 109.49(63) |
| O8—N3—Tb1                 | 177.45(37) | H23B—C23—H23C             | 109.53(49) |
| O4—N3—Tb1                 | 55.78(22)  | O9—C24—N6                 | 125.59(55) |
| O3—N3—Tb1                 | 61.32(23)  | O9—C24—H24                | 117.22(63) |
| N4 <sup>iii</sup> —N4—C18 | 113.74(26) | N6—C24—H24                | 117.19(59) |
| C21—N5—C23                | 121.20(43) | N6—C25—H25A               | 109.43(63) |
| C21—N5—C22                | 122.27(44) | N6—C25—H25B               | 109.45(56) |
| C23—N5—C22                | 116.40(44) | H25A—C25—H25B             | 109.44(66) |
| C24—N6—C26                | 121.53(47) | N6—C25—H25C               | 109.47(55) |
| C24—N6—C25                | 122.30(46) | H25A—C25—H25C             | 109.51(62) |
| C26—N6—C25                | 116.03(49) | H25B—C25—H25C             | 109.51(65) |
| N1—C1—C2                  | 123.64(36) | N6—C26—H26A               | 109.49(57) |
| N1—C1—H1                  | 118.23(41) | N6—C26—H26B               | 109.48(55) |
| C2—C1—H1                  | 118.14(40) | H26A—C26—H26B             | 109.42(61) |
| C3—C2—C1                  | 119.29(40) | N6—C26—H26C               | 109.49(57) |
| C3—C2—H2                  | 120.34(49) | H26A—C26—H26C             | 109.49(65) |
| C1—C2—H2                  | 120.36(37) | H26B—C26—H26C             | 109.45(73) |

**Table S3.** Coordinates for L<sub>1</sub>, L<sub>2</sub> and selected NAC explosives.

| <b>Phen (L<sub>1</sub>)</b> |                      |                    |                                |           |           |
|-----------------------------|----------------------|--------------------|--------------------------------|-----------|-----------|
| <b>Centre Number</b>        | <b>Atomic Number</b> | <b>Atomic Type</b> | <b>Coordinates (Angstroms)</b> |           |           |
|                             |                      |                    | <b>X</b>                       | <b>Y</b>  | <b>Z</b>  |
| 1                           | 6                    | C                  | 3.469208                       | -0.362207 | 0.000469  |
| 2                           | 6                    | C                  | 2.815625                       | 0.844984  | 0.001390  |
| 3                           | 6                    | C                  | 1.409083                       | 0.862424  | 0.000325  |
| 4                           | 6                    | C                  | 0.719870                       | -0.379404 | -0.000261 |
| 5                           | 6                    | C                  | 2.708066                       | -1.545443 | -0.000923 |
| 6                           | 6                    | C                  | 0.677902                       | 2.098675  | 0.000011  |
| 7                           | 6                    | C                  | -0.719867                      | -0.379408 | -0.000218 |
| 8                           | 6                    | C                  | -1.409072                      | 0.862402  | -0.000598 |
| 9                           | 6                    | C                  | -0.677920                      | 2.098662  | -0.000817 |
| 10                          | 6                    | C                  | -2.815634                      | 0.845000  | -0.000339 |
| 11                          | 1                    | H                  | -3.363771                      | 1.783984  | -0.000609 |
| 12                          | 6                    | C                  | -3.469197                      | -0.362196 | 0.000433  |
| 13                          | 6                    | C                  | -2.708047                      | -1.545448 | 0.000844  |
| 14                          | 1                    | H                  | 1.238186                       | 3.031105  | 0.000227  |
| 15                          | 1                    | H                  | 4.555802                       | -0.409375 | 0.000741  |
| 16                          | 1                    | H                  | 3.363702                       | 1.784007  | 0.002544  |
| 17                          | 1                    | H                  | 3.204108                       | -2.511981 | -0.001944 |
| 18                          | 1                    | H                  | -1.238089                      | 3.031159  | -0.001364 |
| 19                          | 1                    | H                  | -4.555792                      | -0.409381 | 0.000745  |
| 20                          | 1                    | H                  | -3.204201                      | -2.511932 | 0.001515  |
| 21                          | 7                    | N                  | 1.380688                       | -1.572547 | -0.000978 |
| 22                          | 7                    | N                  | -1.380694                      | -1.572572 | 0.000442  |

| <b>H<sub>4</sub>abtc (L<sub>2</sub>)</b> |                      |                    |                                |           |           |
|------------------------------------------|----------------------|--------------------|--------------------------------|-----------|-----------|
| <b>Centre Number</b>                     | <b>Atomic Number</b> | <b>Atomic Type</b> | <b>Coordinates (Angstroms)</b> |           |           |
|                                          |                      |                    | <b>X</b>                       | <b>Y</b>  | <b>Z</b>  |
| 1                                        | 6                    | C                  | -1.762238                      | -0.181573 | -0.005030 |
| 2                                        | 6                    | C                  | -2.292627                      | 1.110762  | 0.021986  |
| 3                                        | 6                    | C                  | -2.618328                      | -1.286227 | -0.027001 |
| 4                                        | 6                    | C                  | 4.161500                       | -2.726844 | 0.031232  |
| 5                                        | 6                    | C                  | -4.002892                      | -1.112272 | -0.020543 |
| 6                                        | 6                    | C                  | -4.528215                      | 0.182039  | -0.016461 |
| 7                                        | 6                    | C                  | -3.674130                      | 1.287889  | 0.015234  |
| 8                                        | 6                    | C                  | -4.192934                      | 2.688766  | 0.035583  |
| 9                                        | 6                    | C                  | 1.770723                       | 0.193509  | 0.003969  |
| 10                                       | 6                    | C                  | 2.630484                       | 1.294809  | -0.003602 |
| 11                                       | 6                    | C                  | 2.292120                       | -1.103420 | 0.016747  |
| 12                                       | 6                    | C                  | 4.010775                       | 1.097714  | -0.001454 |
| 13                                       | 6                    | C                  | 4.527940                       | -0.199214 | 0.002101  |
| 14                                       | 6                    | C                  | 3.671557                       | -1.303318 | 0.000776  |
| 15                                       | 6                    | C                  | -4.978850                      | -2.255926 | -0.069081 |
| 16                                       | 6                    | C                  | 4.981562                       | 2.229156  | 0.005240  |
| 17                                       | 1                    | H                  | -2.153136                      | -2.264932 | -0.078246 |
| 18                                       | 1                    | H                  | -5.601474                      | 0.311152  | -0.039348 |

|    |   |   |           |           |           |
|----|---|---|-----------|-----------|-----------|
| 19 | 1 | H | -1.635764 | 1.969333  | 0.041695  |
| 20 | 1 | H | 2.209272  | 2.290964  | -0.006554 |
| 21 | 1 | H | 1.628465  | -1.956387 | 0.041478  |
| 22 | 1 | H | 5.607469  | -0.298753 | 0.035532  |
| 23 | 1 | H | 5.847969  | -2.137530 | -0.685031 |
| 24 | 1 | H | -5.784481 | 3.680147  | 0.041624  |
| 25 | 1 | H | -3.629187 | -3.409529 | 0.673822  |
| 26 | 1 | H | 5.080109  | 4.101516  | 0.014118  |
| 27 | 7 | N | 0.384759  | 0.503299  | 0.010150  |
| 28 | 7 | N | -0.377221 | -0.488637 | -0.019272 |
| 29 | 8 | O | -5.542441 | 2.742477  | 0.030943  |
| 30 | 8 | O | -6.122661 | -2.120129 | -0.404295 |
| 31 | 8 | O | -4.509123 | -3.477473 | 0.285979  |
| 32 | 8 | O | 6.181157  | 2.096070  | 0.004135  |
| 33 | 8 | O | -3.497063 | 3.673426  | 0.054271  |
| 34 | 8 | O | 5.451949  | -2.938823 | -0.323596 |
| 35 | 8 | O | 3.461572  | -3.646899 | 0.352506  |
| 36 | 8 | O | 4.376525  | 3.435887  | 0.010880  |

| <b>NB</b>            |                      |                    |                                |           |           |
|----------------------|----------------------|--------------------|--------------------------------|-----------|-----------|
| <b>Centre Number</b> | <b>Atomic Number</b> | <b>Atomic Type</b> | <b>Coordinates (Angstroms)</b> |           |           |
|                      |                      |                    | <b>X</b>                       | <b>Y</b>  | <b>Z</b>  |
| 1                    | 6                    | C                  | -0.432283                      | 1.216904  | 0.000440  |
| 2                    | 6                    | C                  | 0.240633                       | -0.000015 | 0.000542  |
| 3                    | 6                    | C                  | -0.432255                      | -1.216858 | 0.000202  |
| 4                    | 6                    | C                  | -1.822620                      | -1.209207 | -0.000271 |
| 5                    | 6                    | C                  | -2.517471                      | -0.000035 | -0.000364 |
| 6                    | 6                    | C                  | -1.822583                      | 1.209228  | 0.000026  |
| 7                    | 1                    | H                  | 0.132736                       | 2.136105  | 0.000705  |
| 8                    | 1                    | H                  | 0.132649                       | -2.136120 | 0.000319  |
| 9                    | 1                    | H                  | -2.361108                      | -2.147204 | -0.000565 |
| 10                   | 1                    | H                  | -3.599743                      | 0.000016  | -0.000705 |
| 11                   | 1                    | H                  | -2.361211                      | 2.147156  | -0.000049 |
| 12                   | 7                    | N                  | 1.724881                       | -0.000003 | 0.001048  |
| 13                   | 8                    | O                  | 2.293882                       | -1.083401 | -0.000320 |
| 14                   | 8                    | O                  | 2.293866                       | 1.083398  | -0.000991 |

| <b>1,3-DNB</b>       |                      |                    |                                |           |           |
|----------------------|----------------------|--------------------|--------------------------------|-----------|-----------|
| <b>Centre Number</b> | <b>Atomic Number</b> | <b>Atomic Type</b> | <b>Coordinates (Angstroms)</b> |           |           |
|                      |                      |                    | <b>X</b>                       | <b>Y</b>  | <b>Z</b>  |
| 1                    | 6                    | C                  | 1.198840                       | 1.557649  | -0.000230 |
| 2                    | 6                    | C                  | -0.100360                      | 2.042293  | 0.000042  |
| 3                    | 6                    | C                  | -1.225145                      | 1.201843  | -0.000020 |
| 4                    | 6                    | C                  | -0.962443                      | -0.183144 | -0.000378 |
| 5                    | 6                    | C                  | 0.329016                       | -0.698692 | -0.000651 |
| 6                    | 6                    | C                  | 1.394481                       | 0.182320  | -0.000593 |
| 7                    | 1                    | H                  | 2.053675                       | 2.219547  | -0.000183 |
| 8                    | 1                    | H                  | -0.260666                      | 3.113683  | 0.000315  |

|    |   |   |           |           |           |
|----|---|---|-----------|-----------|-----------|
| 9  | 1 | H | 0.490970  | -1.765766 | -0.000918 |
| 10 | 7 | N | 2.772913  | -0.357687 | -0.000906 |
| 11 | 8 | O | 2.903080  | -1.572068 | 0.001395  |
| 12 | 8 | O | 3.689264  | 0.451992  | 0.001727  |
| 13 | 7 | N | -2.053160 | -1.196623 | -0.000486 |
| 14 | 8 | O | -1.727623 | -2.373904 | -0.000658 |
| 15 | 8 | O | -3.209576 | -0.797314 | -0.000141 |
| 16 | 1 | H | -2.194715 | 1.654430  | 0.000206  |

| 4-NT          |               |             |                         |           |           |
|---------------|---------------|-------------|-------------------------|-----------|-----------|
| Centre Number | Atomic Number | Atomic Type | Coordinates (Angstroms) |           |           |
|               |               |             | X                       | Y         | Z         |
| 1             | 6             | C           | -0.003372               | -1.209901 | 0.000306  |
| 2             | 6             | C           | 1.383628                | -1.201558 | 0.000299  |
| 3             | 6             | C           | 2.076616                | 0.015200  | -0.000004 |
| 4             | 6             | C           | 1.372752                | 1.226090  | -0.000282 |
| 5             | 6             | C           | -0.011282               | 1.219253  | -0.000274 |
| 6             | 6             | C           | -0.688486               | 0.000622  | 0.000008  |
| 7             | 1             | H           | -0.562488               | -2.135012 | 0.000494  |
| 8             | 1             | H           | 1.930584                | -2.139067 | 0.000480  |
| 9             | 1             | H           | 1.929928                | 2.154175  | -0.000519 |
| 10            | 1             | H           | -0.579306               | 2.138964  | -0.000471 |
| 11            | 7             | N           | -2.158243               | -0.006856 | 0.000008  |
| 12            | 8             | O           | -2.732887               | 1.075226  | 0.000720  |
| 13            | 8             | O           | -2.722394               | -1.094902 | -0.000747 |
| 14            | 6             | C           | 3.614503                | 0.095837  | -0.000027 |
| 15            | 1             | H           | 3.944266                | 0.618026  | -0.873797 |
| 16            | 1             | H           | 3.944272                | 0.618421  | 0.873506  |
| 17            | 1             | H           | 4.023504                | -0.892909 | 0.000196  |

| 2,4-DNT       |               |             |                         |           |           |
|---------------|---------------|-------------|-------------------------|-----------|-----------|
| Centre Number | Atomic Number | Atomic Type | Coordinates (Angstroms) |           |           |
|               |               |             | X                       | Y         | Z         |
| 1             | 6             | C           | 1.198844                | 1.557965  | 0.000353  |
| 2             | 6             | C           | -0.100721               | 2.042311  | 0.000329  |
| 3             | 6             | C           | -1.225385               | 1.201998  | 0.000114  |
| 4             | 6             | C           | -0.962043               | -0.182770 | -0.000076 |
| 5             | 6             | C           | 0.328884                | -0.698346 | -0.000051 |
| 6             | 6             | C           | 1.394562                | 0.182721  | 0.000164  |
| 7             | 1             | H           | 2.053433                | 2.220161  | 0.000514  |
| 8             | 1             | H           | -0.261137               | 3.113682  | 0.000480  |
| 9             | 1             | H           | 0.491224                | -1.765495 | -0.000194 |
| 10            | 7             | N           | 2.772845                | -0.357500 | 0.000192  |
| 11            | 8             | O           | 2.902924                | -1.571945 | -0.000077 |
| 12            | 8             | O           | 3.689377                | 0.451976  | 0.000175  |
| 13            | 6             | C           | -2.590942               | 1.837854  | 0.000107  |
| 14            | 1             | H           | -3.172201               | 1.533877  | -0.871596 |
| 15            | 1             | H           | -3.172339               | 1.533597  | 0.871620  |

|    |   |   |           |           |           |
|----|---|---|-----------|-----------|-----------|
| 16 | 1 | H | -2.488703 | 2.923796  | 0.000289  |
| 17 | 7 | N | -2.052817 | -1.196439 | -0.000318 |
| 18 | 8 | O | -1.726421 | -2.373708 | -0.000467 |
| 19 | 8 | O | -3.209586 | -0.797877 | -0.000366 |

| TNT           |               |             |                         |          |          |
|---------------|---------------|-------------|-------------------------|----------|----------|
| Centre Number | Atomic Number | Atomic Type | Coordinates (Angstroms) |          |          |
|               |               |             | X                       | Y        | Z        |
| 1             | 6             | C           | 0.84356                 | -1.23139 | 0.00529  |
| 2             | 6             | C           | 1.55185                 | -0.04249 | 0.00582  |
| 3             | 6             | C           | 0.9074                  | 1.18209  | -0.00982 |
| 4             | 6             | C           | -0.47916                | 1.18913  | -0.04283 |
| 5             | 6             | C           | -1.27769                | 0.03185  | -0.09211 |
| 6             | 6             | C           | -0.54142                | -1.16537 | -0.02853 |
| 7             | 1             | H           | 1.34803                 | -2.18712 | 0.02407  |
| 8             | 1             | H           | 1.46178                 | 2.10993  | -0.00275 |
| 9             | 7             | N           | -1.10171                | 2.54526  | 0.00205  |
| 10            | 8             | O           | -2.17797                | 2.64913  | 0.5687   |
| 11            | 8             | O           | -0.44823                | 3.46714  | -0.45659 |
| 12            | 7             | N           | 3.03407                 | -0.0815  | 0.03489  |
| 13            | 8             | O           | 3.61309                 | 0.99016  | 0.10654  |
| 14            | 8             | O           | 3.55562                 | -1.18126 | 0.12072  |
| 15            | 7             | N           | -1.23486                | -2.48597 | 0.0329   |
| 16            | 8             | O           | -2.34323                | -2.51444 | 0.54376  |
| 17            | 8             | O           | -0.65844                | -3.43619 | -0.46919 |
| 18            | 6             | C           | -2.76555                | 0.06946  | -0.3036  |
| 19            | 1             | H           | -3.29303                | 0.0846   | 0.6531   |
| 20            | 1             | H           | -3.05745                | 0.96694  | -0.84215 |
| 21            | 1             | H           | -3.1024                 | -0.81485 | -0.83798 |

| 4-NP          |               |             |                         |           |           |
|---------------|---------------|-------------|-------------------------|-----------|-----------|
| Centre Number | Atomic Number | Atomic Type | Coordinates (Angstroms) |           |           |
|               |               |             | X                       | Y         | Z         |
| 1             | 6             | C           | 0.363080                | -1.556813 | 0.000682  |
| 2             | 6             | C           | 1.758240                | -1.556813 | 0.000682  |
| 3             | 6             | C           | 2.455778                | -0.349062 | 0.000682  |
| 4             | 6             | C           | 1.758124                | 0.859447  | -0.000517 |
| 5             | 6             | C           | 0.363299                | 0.859369  | -0.000996 |
| 6             | 6             | C           | -0.334302               | -0.348837 | 0.000000  |
| 7             | 1             | H           | -0.186679               | -2.509130 | 0.001132  |
| 8             | 1             | H           | 2.307748                | -2.509326 | 0.001997  |
| 9             | 1             | H           | 2.308324                | 1.811590  | -0.000576 |
| 10            | 1             | H           | -0.186823               | 1.811650  | -0.001949 |
| 11            | 7             | N           | -1.804302               | -0.348593 | -0.000241 |
| 12            | 8             | O           | -2.374441               | 0.706566  | -0.000830 |
| 13            | 8             | O           | -2.374777               | -1.403565 | 0.000161  |
| 14            | 8             | O           | 3.885777                | -0.348958 | 0.001506  |
| 15            | 1             | H           | 4.206754                | -0.350230 | -0.903244 |



| 2,6-DNP       |               |             |                         |           |           |
|---------------|---------------|-------------|-------------------------|-----------|-----------|
| Centre Number | Atomic Number | Atomic Type | Coordinates (Angstroms) |           |           |
|               |               |             | X                       | Y         | Z         |
| 1             | 6             | C           | 1.207504                | 1.542137  | 0.000222  |
| 2             | 6             | C           | 0.000462                | 2.235170  | 0.000136  |
| 3             | 6             | C           | -1.207115               | 1.542031  | -0.000065 |
| 4             | 6             | C           | -1.183179               | 0.151545  | -0.000177 |
| 5             | 6             | C           | 0.000168                | -0.572733 | -0.000090 |
| 6             | 6             | C           | 1.183096                | 0.150954  | 0.000121  |
| 7             | 1             | H           | 2.160116                | 2.053113  | 0.000397  |
| 8             | 1             | H           | -0.000011               | 3.317768  | 0.000237  |
| 9             | 1             | H           | -0.000345               | -1.652510 | -0.000156 |
| 10            | 7             | N           | 2.468965                | -0.590427 | 0.000235  |
| 11            | 8             | O           | 2.413454                | -1.809944 | 0.000279  |
| 12            | 8             | O           | 3.495766                | 0.072260  | 0.000513  |
| 13            | 7             | N           | -2.469490               | -0.590280 | -0.000369 |
| 14            | 8             | O           | -2.413150               | -1.809592 | -0.000430 |
| 15            | 8             | O           | -3.496342               | 0.072052  | -0.000397 |
| 16            | 1             | H           | -2.159523               | 2.053757  | -0.000140 |

| TNP           |               |             |                         |          |          |
|---------------|---------------|-------------|-------------------------|----------|----------|
| Centre Number | Atomic Number | Atomic Type | Coordinates (Angstroms) |          |          |
|               |               |             | X                       | Y        | Z        |
| 1             | 6             | C           | 0.75179                 | -1.28867 | -0.0274  |
| 2             | 6             | C           | 1.54418                 | -0.14728 | -0.06905 |
| 3             | 6             | C           | 0.99525                 | 1.12222  | -0.03557 |
| 4             | 6             | C           | -0.38332                | 1.23846  | 0.02249  |
| 5             | 6             | C           | -1.24837                | 0.11188  | 0.01733  |
| 6             | 6             | C           | -0.62204                | -1.15007 | -0.00739 |
| 7             | 1             | H           | 1.2105                  | -2.26817 | -0.02676 |
| 8             | 7             | N           | -1.42767                | -2.39996 | -0.02459 |
| 9             | 8             | O           | -2.41505                | -2.42257 | -0.72917 |
| 10            | 8             | O           | -1.13044                | -3.22789 | 0.82212  |
| 11            | 7             | N           | -0.95324                | 2.58883  | 0.08881  |
| 12            | 8             | O           | -2.1414                 | 2.72357  | -0.23756 |
| 13            | 8             | O           | -0.2132                 | 3.51619  | 0.33088  |
| 14            | 1             | H           | 1.62834                 | 1.99875  | -0.03066 |
| 15            | 8             | O           | -2.56828                | 0.17068  | 0.08474  |
| 16            | 1             | H           | -2.82225                | 1.11621  | 0.05867  |
| 17            | 7             | N           | 3.0139                  | -0.29178 | -0.13743 |
| 18            | 8             | O           | 3.67326                 | 0.73456  | -0.07467 |
| 19            | 8             | O           | 3.46107                 | -1.42525 | -0.05775 |

**Table S4.** A comparative study of the  $K_{sv}$ , and medium used for TNP detection of some recent representative reports.

| Tb-MOFs                                                                                                                                                                                                              | $K_{sv}$                                                             | Medium used      | Publications                                    |
|----------------------------------------------------------------------------------------------------------------------------------------------------------------------------------------------------------------------|----------------------------------------------------------------------|------------------|-------------------------------------------------|
| [Tb(1,3,5-BTC)] <sub>n</sub><br>BTC = 1,3,5-benzenetricarboxylate                                                                                                                                                    | 34182.1 M <sup>-1</sup>                                              | Ethanol          | <i>J. Mater. Chem. A</i> , 2013, 1, 8745-8752   |
| {[Tb(L <sub>1</sub> ) <sub>1.5</sub> (H <sub>2</sub> O)]·3H <sub>2</sub> O} <sub>n</sub><br>H <sub>2</sub> L <sub>1</sub> = 2-(2-Hydroxy-propionylamino)-terephthalic acid                                           | 7.47 × 10 <sup>4</sup> M <sup>-1</sup>                               | H <sub>2</sub> O | <i>Chem. Eur. J.</i> , 2015, 21, 15705–15712    |
| [Tb(BTB)H <sub>2</sub> O]<br>H <sub>3</sub> BTB = 1,3,5-Benzenetrisbenzoic acid                                                                                                                                      | 3.25 × 10 <sup>-2</sup> ppm <sup>-1</sup>                            | H <sub>2</sub> O | <i>Dalton Trans.</i> , 2015, 44, 14594–14603    |
| [Y <sub>0.9</sub> Tb <sub>0.1</sub> (OBA)(Ox) <sub>0.5</sub> (H <sub>2</sub> O) <sub>2</sub> ]<br>OBA = 4,4'- Oxybis(benzoic acid),<br>Ox = Oxalate                                                                  | 3.19 × 10 <sup>4</sup> M <sup>-1</sup>                               | Acetonitrile     | <i>RSC Adv.</i> , 2015, 5, 102076–102084        |
| [Tb(L)(OH)]·x(solvent)<br>H <sub>2</sub> L = 5-(4-carboxyphenyl)pyridine-2-carboxylate                                                                                                                               | 7.73 × 10 <sup>-2</sup> ppm <sup>-1</sup>                            | H <sub>2</sub> O | <i>J. Mater. Chem. A</i> , 2015, 3, 12690–12697 |
| [Tb <sub>2</sub> (H <sub>2</sub> L) <sub>3</sub> (H <sub>2</sub> O) <sub>2</sub> ]·21H <sub>2</sub> O<br>H <sub>4</sub> L = 1,4-C <sub>6</sub> H <sub>4</sub> (CH(OH)(PO <sub>3</sub> H <sub>2</sub> )) <sub>2</sub> | 9.2 × 10 <sup>3</sup> M <sup>-1</sup>                                | Ethanol          | <i>J. Mater. Chem. A</i> , 2017, 5, 1952–1956   |
| {[Tb <sub>2</sub> (L) <sub>2</sub> (OH)(HCOO)]·[H <sub>2</sub> O]} <sub>n</sub><br>H <sub>2</sub> L = 4'-(4-(3,5-dicarboxylphenoxy)phenyl)-4,2':6',4''-terpyridine                                                   | 5.1 × 10 <sup>-2</sup> ppm <sup>-1</sup>                             | H <sub>2</sub> O | <i>Dalton Trans.</i> , 2017, 46, 15434–15442    |
| {[Tb(L <sub>1</sub> )(L <sub>2</sub> ) <sub>0.5</sub> (NO <sub>3</sub> )(DMF)].DMF} <sub>n</sub> L <sub>1</sub> = 1,10-phenanthroline (phen),<br>L <sub>2</sub> = 3,3',5,5'-azobenzene-tetra carboxylic acid         | 15.97 ppm <sup>-1</sup><br>(5.67 × 10 <sup>5</sup> M <sup>-1</sup> ) | H <sub>2</sub> O | <b>Present work</b>                             |
